# Supplementary material
Source: publisher figshare collection journal article supplement (https://sage.figshare.com/ndownloader/files/22222284)
Supplement: Supplementary file 1 [file 22222284]

## Classification of Issues

The measure we use for our dependent variables -  $PE_{RR}$ ,  $PE_{RL}$ ,  $PE_{LL}$  and  $PE_{RL-}$  - utilize 15 of the 56 issue categories, comprising 3 of the 7 domains, identified in the CMP dataset. Here is the list of the 15 categories together with the description of each category as provided by the CMP.

### 1. Right Economic Position

#### *Domain 1: Economy*

1) **per 401 Free Market Economy** It includes favorable references to: Laissez-faire economy; superiority of individual enterprise over state and control systems; private property rights; personal enterprise and initiative; need for unhampered individual enterprises.

2) **per 402 Incentives: Positive** Favorable mentions of supply side oriented economic policies (assistance to businesses rather than consumers). It includes: Financial and other incentives such as subsidies, tax breaks etc.; wage and tax policies to induce enterprise; encouragement to start enterprises.

3) **per 407 Protectionism: Negative** Support for the concept of free trade and open markets. Call for abolishing all means of market protection (in the manifesto or any other country).

4) **per 414 Economic Orthodoxy** Need for economically healthy government policy making. May include calls for: Reduction of budget deficits; retrenchment in crisis; thrift and savings in the face of economic hardship; support for traditional economic institutions such as stock market and banking system; support for strong currency.

#### *Domain 2: Welfare and Quality of Life*

5) **per 505 Welfare State Limitation** Limiting state expenditures on social services or social security. Favorable mentions of the social subsidiary principle (i.e. private care before state care).

#### *Domain 3: Social Groups*

6) **per 702 Labor Groups: Negative** Negative references to labor groups and trade unions. May focus specifically on the danger of unions 'abusing power'.

## 2. Left Economic Position

### *Domain 1: Economy*

- 1) **per 403 Market Regulation** Support for policies designed to create a fair and open economic market. May include: Calls for increased consumer protection; increasing economic competition by preventing monopolies and other actions disrupting the functioning of the market; defense of small businesses against disruptive powers of big businesses; social market economy.
- 2) **per 404 Economic Planning** Favorable mentions of long-standing economic planning by the government. May be: Policy plans, strategies, policy patterns etc.; of a consultative or indicative nature.
- 3) **per 406 Protectionism: Positive** Favorable mentions of extending or maintaining the protection of internal markets (by the manifesto or other countries). Measures may include: Tariffs; quota restrictions; export subsidies.
- 4) **per 412 Controlled Economy** Support for direct government control of economy. May include, for instance: Control over prices; introduction of minimum wages.
- 5) **per 413 Nationalization** Favorable mentions of government ownership of industries, either partial or complete; calls for keeping nationalized industries in state hand or nationalizing currently private industries. May also include favorable mentions of government ownership of land.
- 6) **per 415 Marxist Analysis** Positive references to Marxist-Leninist ideology and specific use of Marxist-Leninist terminology by the manifesto party (typically but not necessary by communist parties).

### *Domain 2: Welfare and Quality of Life*

- 7) **per 504 Welfare State Expansion** Favorable mentions of need to introduce, maintain or expand any public social service or social security scheme. This includes, for example, government funding of: Health care ; child care ; elder care and pensions; social housing.

### *Domain 3: Social Groups*

- 9) **per 701 Labor Groups: Positive** Favorable references to all labor groups, the working class, and unemployed workers in general. Support for trade unions and calls for the good treatment of all employees, including: More jobs; good working conditions; fair wages; pension provisions etc.

### **3. Operationalization of Variables**

#### **3.1. Rightist Dimension of Economic Ideology (for $PE_{RR}$ & $PE_{LR}$ ):**

Per 401+per 402+ per 407+ per 414+per 505+per 702

#### **3.2. Leftist Dimension of Economic Ideology (for $PE_{LL}$ & $PE_{RL}$ ):**

Per 403+ per 404+ per 406+per 412+ per 413+per 415+per 504+per 701

#### 4. Likelihood Ratio Test Results for Random Effects

##### 4.1 Hypotheses for random effect in Model 1 and 2:

Hypothesis 1: The random effects associated with the effect of GDP can be omitted from Model 1 (Model2).

Hypothesis 2: The random effects associated with the effect of Pop can be omitted from Model 1 (Model 2).

Hypothesis 3: The random effects associated with the effect of KOF can be omitted from Model 1 (Model 2).

| Model 1          |                                         |           |           |                                      |         |
|------------------|-----------------------------------------|-----------|-----------|--------------------------------------|---------|
| Hypothesis Label | Models Compared (Nested vs. References) | LRT (1)   | LRT (As)  | Test Statistic Value (Calculation)   | p-Value |
| 1                | Model A1 vs. Model 1                    | -1029.697 | -1067.397 | $X^2(1:2)=75.4$<br>(2134.7-2059.3)   | 0.0000  |
| 2                | Model A2 vs. Model 1                    | -1029.697 | -1073.12  | $X^2(1:2)=86.94$<br>(2146.4-2059.3)  | 0.0000  |
| 3                | Model A3 vs. Model 1                    | -1029.697 | -1048.509 | $X^2(1:2)=37.718$<br>(2097.0-2059.3) | 0.0000  |
| Model 2          |                                         | LRT(2)    | LRT(Bs)   |                                      |         |
| 1                | Model B1 vs. Model 2                    | -1024.242 | -1037.098 | $X^2(1:2)=25.79$<br>(2074.1-2048.4)  | 0.0000  |
| 2                | Model B2 vs. Model 2                    | -1024.242 | -1036.976 | $X^2(1:2)=25.52$<br>(2073.9-2048.4)  | 0.0000  |
| 3                | Model B3 vs. Model 2                    | -1024.242 | -1028.157 | $X^2(1:2)=7.91$<br>(2056.3-2048.4)   | 0.0120  |

## 4.2 Hypotheses for random effect in Model 3 and 4:

Hypothesis 1: The random effects associated with the effect of GDP can be omitted from Model 3 (Model4).

Hypothesis 2: The random effects associated with the effect of Pop can be omitted from Model 3 (Model 4).

Hypothesis 3: The random effects associated with the effect of KOF can be omitted from Model 3 (Model 4).

| Model 3          |                                         |           |           |                                    |         |
|------------------|-----------------------------------------|-----------|-----------|------------------------------------|---------|
| Hypothesis Label | Models Compared (Nested vs. References) | LRT (3)   | LRT (Cs)  | Test Statistic Value (Calculation) | p-Value |
| 1                | Model C1 vs. Model 3                    | -1283.96  | -1299.316 | $X^2(1:2)=30.7$<br>(2598.6-2567.9) | 0.0000  |
| 2                | Model C2 vs. Model 3                    | -1283.96  | -1302.635 | $X^2(1:2)=37.3$<br>(2605.2-2567.9) | 0.0000  |
| 3                | Model C3 vs. Model 3                    | -1283.96  | -1292.517 | $X^2(1:2)=17.1$<br>(2585.0-2567.9) | 0.0001  |
| Model 4          |                                         | LRT (4)   | LRT (Ds)  |                                    |         |
| 1                | Model D1 vs. Model 4                    | -950.5809 | -985.3992 | $X^2(1:2)=69.6$<br>(1970.7-1901.1) | 0.0000  |
| 2                | Model D2 vs. Model 4                    | -950.5809 | -987.6612 | $X^2(1:2)=74.2$<br>(1975.3-1901.1) | 0.0000  |
| 3                | Model D3 vs. Model 4                    | -950.5809 | -966.767  | $X^2(1:2)=32.4$<br>(1933.5-1901.1) | 0.0000  |

## 5. Robustness Tests-Model Specifications

*Model 2.1*

$$PE_{ti(RL)} = \beta_0 + \beta_1 trade + \beta_2 FDI + \beta_3 capital + \beta_4 pop + u_{0i} + u_{1i} trade + u_{2i} FDI + u_{3i} capital + u_{4i} pop + \varepsilon_{ti}$$

*Model 4.1*

$$PE_{ti(LR)} = \beta_0 + \beta_1 trade + \beta_2 FDI + \beta_3 capital + \beta_4 pop + u_{0i} + u_{1i} trade + u_{2i} FDI + u_{3i} capital + u_{4i} pop + \varepsilon_{ti}$$

*Model 2.2*

$$PE_{ti(RL)} = \beta_0 + \beta_1 GDP + \beta_2 pop + \beta_3 CSGR + u_{0i} + u_{1i} GDP + u_{2i} pop + u_{3i} CSGR + \varepsilon_{ti}$$

*Model 4.2*

$$PE_{ti(LR)} = \beta_0 + \beta_1 GDP + \beta_2 pop + \beta_3 CSGR + u_{0i} + u_{1i} GDP + u_{2i} pop + u_{3i} CSGR + \varepsilon_{ti}$$

*Model 2.3*

$$PE_{ti(RL)} = \beta_0 + \beta_1 GDP + \beta_2 pop + \beta_3 KOF + \varepsilon_{ti}$$

*Model 4.3*

$$PE_{ti(LR)} = \beta_0 + \beta_1 GDP + \beta_2 pop + \beta_3 KOF + \varepsilon_{ti}$$

*Model 2.4*

$$PE_{ti(RL)} = \gamma_i + \beta_0 + \beta_1 GDP + \beta_2 pop + \beta_3 KOF + \varepsilon_{ti}$$

*Model 4.4*

$$PE_{ti(LR)} = \gamma_i + \beta_0 + \beta_1 GDP + \beta_2 pop + \beta_3 KOF + \varepsilon_{ti}$$

*Model 2.5*

$$PE_{ti(RL)} = \beta_0 + \beta_1 PE_{(t-1)i(RL)} + \beta_2 GDP + \beta_3 pop + \beta_4 KOF + \varepsilon_{ti}$$

*Model 4.5*

$$PE_{ti(LR)} = \beta_0 + \beta_1 PE_{(t-1)i(LR)} + \beta_2 GDP + \beta_3 pop + \beta_4 KOF + \varepsilon_{ti}$$

*Model 2.6*

$$\Delta PE_{ti(RL)} = \beta_0 + \beta_1 \Delta GDP + \beta_2 \Delta pop + \beta_3 \Delta KOF + u_{0i} + u_{1i} \Delta GDP + u_{2i} \Delta pop + u_{3i} \Delta KOF + \varepsilon_{ti}$$

*Model 4.6*

$$\Delta PE_{ti(LR)} = \beta_0 + \beta_1 \Delta GDP + \beta_2 \Delta pop + \beta_3 \Delta KOF + u_{0i} + u_{1i} \Delta GDP + u_{2i} \Delta pop + u_{3i} \Delta KOF + \varepsilon_{ti}$$

*Model 2.7*

$$AWPE_{ti(RL)} = \beta_0 + \beta_1 trade + \beta_2 FDI + \beta_3 capital + \beta_4 pop + u_{0i} + u_{1i} trade + u_{2i} FDI + u_{3i} capital + u_{4i} pop + \varepsilon_{ti}$$

*Model 4.7*

$$AWPE_{ti(LR)} = \beta_0 + \beta_1 trade + \beta_2 FDI + \beta_3 capital + \beta_4 pop + u_{0i} + u_{1i} trade + u_{2i} FDI + u_{3i} capital + u_{4i} pop + \varepsilon_{ti}$$



## Robustness Check Results

Table 3: Models 2.1&Model 4.1

| Models                   | Model 2.1 (DV: PE <sub>RL</sub> ) | Model 4.1 (DV: PE <sub>LR</sub> ) |
|--------------------------|-----------------------------------|-----------------------------------|
| Fixed Effect Parameter   |                                   |                                   |
| Intercept                | 7.341966 (0.0000) <sup>***</sup>  | 4.323266 (0.0000) <sup>***</sup>  |
| Trade                    | 0.054028 (0.0079) <sup>***</sup>  | 0.003643 (0.6507)                 |
| FDI                      | 0.103814 (0.0602)                 | 0.004635 (0.8175)                 |
| Capital                  | -0.00065 (0.9518)                 | -0.009066 (0.0859)                |
| Pop                      | 0.000000 (0.0613)                 | 0.000000 (0.6939)                 |
| Covariance Parameter     |                                   |                                   |
| $\sigma^2_{int}$         | 7.72                              | 3.37                              |
| $\sigma^2_{Trade}$       | 0.003                             | 0.0004                            |
| $\sigma^2_{FDI}$         | 0.012                             | 0.0003                            |
| $\sigma^2_{Capital}$     | 0.000                             | 0.0007                            |
| $\sigma^2_{Pop}$         | 0.000                             | 0.000                             |
| ICCs                     |                                   |                                   |
| $\sigma_{Trade,int}$     | -0.628                            | -0.417                            |
| $\sigma_{FDI,int}$       | -0.211                            | -0.004                            |
| $\sigma_{Capital,int}$   | -0.015                            | -0.100                            |
| $\sigma_{Pop,int}$       | -0.132                            | -0.399                            |
| Correlation Coefficient  |                                   |                                   |
| $\sigma_{Trade,FDI}$     | -0.048                            | -0.017                            |
| $\sigma_{Trade,Capital}$ | 0.033                             | -0.077                            |
| $\sigma_{Trade,Pop}$     | 0.032                             | 0.134                             |
| $\sigma_{FDI,Capital}$   | -0.002                            | -0.050                            |
| $\sigma_{FDI,Pop}$       | 0.007                             | -0.008                            |
| $\sigma_{Capital,Pop}$   | -0.006                            | 0.073                             |
| $\sigma^2$               | 23.81                             | 7.41                              |



Table 4: Models 2.2 &amp; 4.2

| Models                  | Model 2.2 (DV: $PE_{RL}$ ) | Model 4.2 (DV: $PE_{LR}$ ) |
|-------------------------|----------------------------|----------------------------|
| Fixed Effect Parameter  |                            |                            |
| Intercept               | 1.24557 (0.5996)           | 4.248926 (0.0003)***       |
| GDP                     | 0.04563 (0.6390)           | -0.058335 (0.4262)         |
| Pop                     | 0.00000 (0.0522)           | 0.000000 (0.9454)          |
| CSGR                    | 61.88617 (0.0012)***       | -2.350647 (0.7198)         |
| Covariance Parameter    |                            |                            |
| $\sigma^2_{int}$        | 14.36                      | 12.45                      |
| $\sigma^2_{GDP}$        | 0.013                      | 0.017                      |
| $\sigma^2_{Pop}$        | 0.012                      | 0.000                      |
| $\sigma^2_{CSGR}$       | 2.787                      | 209.11                     |
| ICCs                    |                            |                            |
| $\sigma_{GDP,int}$      | 0.812                      | -0.855                     |
| $\sigma_{Pop,int}$      | 0.393                      | -0.130                     |
| $\sigma_{CSGR,int}$     | -0.965                     | -0.980                     |
| Correlation Coefficient |                            |                            |
| $\sigma_{GDP,Pop}$      | 0.513                      | 0.124                      |
| $\sigma_{GDP,CSGR}$     | -0.876                     | 0.813                      |
| $\sigma_{CSGR,Pop}$     | -0.536                     | 0.090                      |
| $\sigma^2$              | 19.78                      | 6.30                       |

Table 5: Models 2.3 &amp; 4.3

| Models    | Model 2.3 (DV: $PE_{RL}$ ) | Model 4.3 (DV: $PE_{LR}$ ) |
|-----------|----------------------------|----------------------------|
| Intercept | 5.8415 (0.000)***          | 5.9991 (0.000)             |
| GDP       | 0.0679 (0.199)             | 0.0167 (0.620)             |
| Pop       | 0.0000 (0.032)**           | 0.0000 (0.433)             |
| KOF       | 0.0846 (0.000)***          | -0.0270 (0.014)**          |

Table 6: Models 2.4 &amp; 4.4

| Models (Country Level)   | Model 2.4 (DV: $PE_{RL}$ ) | Model 4.4 (DV: $PE_{LR}$ ) |
|--------------------------|----------------------------|----------------------------|
| Intercept                | 4.241 (0.009)***           | 4.966 (0.000)***           |
| GDP                      | 0.062 (0.281)              | 0.018 (0.5139)             |
| Pop                      | 0.000 (0.192)              | 0.000 (0.5981)             |
| KOF                      | 0.115 (0.000)***           | -0.012 (0.2533)            |
| $\hat{\sigma}_y$         | 4.92                       | 2.571                      |
| $\hat{\sigma}_{country}$ | 2.717                      | 1.486                      |

Table 7: Models 2.5 & 4.5

| Models         | Model 2.5 (DV: $PE_{RL}$ )   | Model 4.5 (DV: $PE_{LR}$ )     |
|----------------|------------------------------|--------------------------------|
| Intercept      | 0.467 (0.000) <sup>***</sup> | 4.185 (0.000) <sup>***</sup>   |
| GDP            | 0.953 (0.112)                | 0.021 (0.513)                  |
| $PE_{RL(lag)}$ | 0.467(0.000) <sup>***</sup>  |                                |
| $PE_{LR(lag)}$ |                              | 0.393(0.000) <sup>***</sup>    |
| Pop            | 0.000 (0.132)                | -0.0000 (0.193)                |
| KOF            | 0.059 (0.002) <sup>***</sup> | -0.0240 (0.009) <sup>***</sup> |

Table 8: Models 2.6 &amp; 4.6

| Models                  | Model 2.6 (DV: $\Delta PE_{RL}$ ) | Model 4.6 (DV: $\Delta PE_{LR}$ ) |
|-------------------------|-----------------------------------|-----------------------------------|
| Fixed Effect Parameter  |                                   |                                   |
| Intercept               | 0.1966 (0.6359)                   | 0.1773 (0.4016)                   |
| $\Delta GDP$            | 0.0494 (0.3749)                   | 0.0345 (0.3974)                   |
| $\Delta Pop$            | 0.0000 (0.4793)                   | 0.0000 (0.9256)                   |
| $\Delta KOF$            | 0.1743 (0.0289) <sup>***</sup>    | -0.06093 (0.1254)                 |
| Covariance Parameter    |                                   |                                   |
| $\sigma_{int}^2$        | 0.099                             | 0.000                             |
| $\sigma_{GDP}^2$        | 0.0003                            | 0.013                             |
| $\sigma_{Pop}^2$        | 0.0000                            | 0.000                             |
| $\sigma_{KOF}^2$        | 0.0276                            | 0.000                             |
| ICCs                    |                                   |                                   |
| $\sigma_{GDP,int}$      | 0.082                             | -0.093                            |
| $\sigma_{Pop,int}$      | 0.067                             | 0.000                             |
| $\sigma_{KOF,int}$      | -0.605                            | -0.002                            |
| Correlation Coefficient |                                   |                                   |
| $\sigma_{GDP,Pop}$      | -0.022                            | 0.066                             |
| $\sigma_{GDP,KOF}$      | -0.090                            | -0.120                            |
| $\sigma_{KOF,Pop}$      | -0.146                            | -0.013                            |
| $\sigma^2$              | 30.90                             | 9.55                              |

Table 9: Models 2.7 &amp; 4.7

| Models                  | Model 2.7 (DV: $\Delta AWPE_{RL}$ ) | Model 4.7 (DV: $\Delta AWPE_{LR}$ ) |
|-------------------------|-------------------------------------|-------------------------------------|
| Fixed Effect Parameter  |                                     |                                     |
| Intercept               | 103.29631(0.0588)*                  | 117.501 (0.0002)***                 |
| $\Delta GDP$            | 0.37105(0.84899)                    | 0.04637 (0.9599)                    |
| $\Delta Pop$            | 0.00000(0.4234)                     | 0.00000 (0.4174)                    |
| $\Delta KOF$            | 2.01314(0.0296)**                   | -0.50338(0.1999)                    |
| Covariance Parameter    |                                     |                                     |
| $\sigma_{int}^2$        | 33.68                               | 18.95                               |
| $\sigma_{GDP}^2$        | 17.09                               | 1.147                               |
| $\sigma_{Pop}^2$        | 0.000                               | 0.000                               |
| $\sigma_{KOF}^2$        | 17.21                               | 1.682                               |
| ICCs                    |                                     |                                     |
| $\sigma_{GDP,int}$      | -0.436                              | -0.289                              |
| $\sigma_{Pop,int}$      | 0.384                               | -0.833                              |
| $\sigma_{KOF,int}$      | -0.843                              | -0.960                              |
| Correlation Coefficient |                                     |                                     |
| $\sigma_{GDP,Pop}$      | -0.222                              | 0.344                               |
| $\sigma_{GDP,KOF}$      | 0.425                               | 0.180                               |
| $\sigma_{KOF,Pop}$      | -0.718                              | 0.728                               |
| $\sigma^2$              | 19.05                               | 6.16                                |

Note: DV calculated as the party-family mean, weighted by party relevance (i.e. percentage of the vote won by the given party).
